# Supplementary material for: Hearing loss in adults, assessment and management: summary of NICE guidance
Source: HighWire-hosted journal article supplement (doi:10.1136/bmj.k2219), 2018-06-22

**Presentation**

**Possible causes**

|                                                               |                                                                                                                   |                                                                                             |
|---------------------------------------------------------------|-------------------------------------------------------------------------------------------------------------------|---------------------------------------------------------------------------------------------|
| Acquired unilateral hearing loss                              | With ipsilateral fifth or seventh cranial nerve symptoms and signs                                                | Viral VS Stroke                                                                             |
| Immunocompromised adults with hearing loss                    | Otalgia and otorrhoea unresponsive to treatment within 72 hours                                                   | OE Nec OE SBO                                                                               |
| Sudden sensorineural hearing loss                             | Occurring over a period of 3 days or less                                                                         | Injury Auto Idio Tox Viral VS Stroke<br>Seen within 30 days<br>Seen after more than 30 days |
| Rapid-onset hearing loss                                      | Occurring between 4 and 90 days                                                                                   | Cho Auto Idio Tox VS                                                                        |
| Chinese or south-east Asian family origin                     | Middle ear effusion not associated with an upper respiratory tract infection                                      | NC                                                                                          |
| Unilateral or asymmetric hearing loss                         | Presents with obvious difference in hearing between the two ears                                                  | SOM Ch Oto VS Tu IAC Tu CPA                                                                 |
| Fluctuating hearing loss                                      | Not associated with an upper respiratory tract infection                                                          | MD                                                                                          |
| Hearing loss with hyperacusis                                 | Intolerance to everyday sounds that causes significant distress and affects a person's day-to-day activities      | Deh MD                                                                                      |
| Hearing loss with persistent tinnitus                         | Unilateral, pulsatile, has significantly changed in nature or is causing distress                                 | Unilateral: MD VS<br>Pulsatile: Tu Vas BIH CA CAS Myo<br>Changed: Anx Stress                |
| Hearing loss with vertigo                                     | Not fully resolved or recurrent                                                                                   | Deh MD                                                                                      |
| Hearing loss that is not age related                          | Any of the acquired causes mentioned above                                                                        | Gen Noise Tox                                                                               |
| Hearing loss with partial or complete obstruction             | Obstruction of the external auditory canal prevents full examination of the eardrum or taking an aural impression | FB Fur OE Ch Sten Tu EAC Wax Cho OM Ch                                                      |
| Hearing loss with pain affecting either ear                   | Lasting for 1 week or more and not responsive to first-line treatment                                             | Fur OE Ch Tu EAC Tu Nas TMJ                                                                 |
| Hearing loss with a history of discharge (other than wax)     | Not resolved, and not responsive to prescribed treatment or recurs                                                | All EM FB OE Cho                                                                            |
| Hearing loss with abnormal appearance of outer ear or eardrum | Inflammation Swelling Tumour Bleeding                                                                             | Fur OE Ch Tu EAC Perf Cho SOM Ch                                                            |
| Hearing loss with a middle ear effusion                       | In the absence of, or that persists after, an acute upper respiratory tract infection                             | All Rh Sin Ch Tu Nas                                                                        |

**Urgent Referral**  
To be seen within 2 weeks

**Routine Referral**  
ENT, AVM or specialist audiology service for diagnostic investigation using a local pathway

ENT (ear, nose and throat service)

**KEY**

**External ear**

- All EM Allergy to ear mould material
- FB Foreign body
- Fur Furuncle
- OE Otitis externa
- OE Ch Otitis externa (chronic)
- Sten Stenosis
- Tu EAC Tumour of external auditory canal
- Wax Impacted wax
- Perf Perforated ear drum

**Intercranial**

- BIH Benign intracranial hypertension
- CA Cerebral aneurysm
- CAS Carotid atherosclerosis
- Myo Brainstem pathology (myoclonus)
- Nec OE Necrotising otitis externa
- SBO Skull base osteomyelitis
- Stroke Anterior inferior cerebellar artery stroke
- Tu CPA Tumour within cerebello-pontine angle

**Middle ear**

- Cho Cholesteatoma
- OM Ch Otitis media (chronic)
- SOM Ch Suppurative otitis media (chronic)
- Injury Head injury
- Gen Genetic
- Oto Otosclerosis

**Internal auditory canal**

- Tu IAC Tumour within internal auditory canal
- Tu Vas Vascular tumours
- VS Vestibular schwannoma

**Inner Ear**

- Viral Viral infection
- Auto Auto-immune disease
- Deh Dehiscent superior semi-circular canal
- Idio Idiopathic
- Noise Noise induced
- Tox Ototoxicity
- MD Ménière's disease

**Other**

- All Rh Allergic rhinitis
- Sin Ch Sinus disease (Chronic)
- NC Nasopharyngeal carcinoma
- Tu Nas Tumour of nasopharynx
- Anx Anxiety
- Stress Stress
- TMJ Coincidental temporomandibular joint disorder

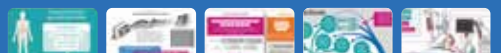

Supplement: ftos250418.wi.pdf [file ftos250418.wi.pdf]
